# Supplementary material for: Antimony doping to enhance luminescence of tin(iv)-based hybrid metal halides
Source: Royal Society of Chemistry journal article supplement (doi:10.1039/d2qi00884j), 2022-01-01
Supplement: d2qi00884j1.pdf [file d2qi00884j1.pdf]

## Supporting Information

# Antimony Doping to Enhance Luminescence of Tin (IV)-Based Hybrid Metal Halides

Kunjie Liu,<sup>a</sup> Shiqiang Hao,<sup>b</sup> Jindong Cao,<sup>a</sup> Jiawei Lin,<sup>c</sup> Liubing Fan,<sup>a</sup> Xusheng Zhang,<sup>a</sup>

Zhongnan Guo,<sup>c</sup> Christopher Wolverton,<sup>b</sup> Jing Zhao,<sup>\*a</sup> and Quanlin Liu,<sup>a</sup>

<sup>a</sup>The Beijing Municipal Key Laboratory of New Energy Materials and Technologies, School of Materials Sciences and Engineering, University of Science and Technology Beijing, Beijing 100083, P. R. China.

<sup>b</sup>Department of Materials Science and Engineering, Northwestern University, Evanston, Illinois 60208, United States.

<sup>c</sup>Department of Chemistry, School of Chemistry and Biological Engineering, University of Science and Technology Beijing, Beijing, 100083, P. R. China.

**\*Corresponding Author**

\*E-mail: [jingzhao@ustb.edu.cn](mailto:jingzhao@ustb.edu.cn)

## CONTENTS

**Table S1.** (Atomic coordinates ( $\times 10^4$ ) and equivalent isotropic displacement parameters ( $\text{\AA}^2 \times 10^3$ ) for  $(\text{C}_9\text{H}_{15}\text{N}_3)_2\text{SnCl}_8$  at 150.0 K with estimated standard deviations in parentheses.)

**Table S2.** (Atomic coordinates ( $\times 10^4$ ) and equivalent isotropic displacement parameters ( $\text{\AA}^2 \times 10^3$ ) for  $(\text{C}_9\text{H}_{15}\text{N}_3)_2\text{SnBr}_8$  at 150.0 K with estimated standard deviations in parentheses.)

**Table S3.** (Anisotropic displacement parameters ( $\text{\AA}^2 \times 10^3$ ) for  $(\text{C}_9\text{H}_{15}\text{N}_3)_2\text{SnCl}_8$  at 150.0 K with estimated standard deviations in parentheses.)

**Table S4.** (Anisotropic displacement parameters ( $\text{\AA}^2 \times 10^3$ ) for  $(\text{C}_9\text{H}_{15}\text{N}_3)_2\text{SnBr}_8$  at 150.0 K with estimated standard deviations in parentheses.)

**Table S5.** (Bond lengths [ $\text{\AA}$ ] for  $(\text{C}_9\text{H}_{15}\text{N}_3)_2\text{SnCl}_8$  at 150.0 K with estimated standard deviations in parentheses.)

**Table S6.** (Bond lengths [ $\text{\AA}$ ] for  $(\text{C}_9\text{H}_{15}\text{N}_3)_2\text{SnBr}_8$  at 150.0 K with estimated standard deviations in parentheses.)

**Table S7.** (Bond angles [ $^\circ$ ] for  $(\text{C}_9\text{H}_{15}\text{N}_3)_2\text{SnCl}_8$  at 150.0 K with estimated standard deviations in parentheses.)

**Table S8.** (Bond angles [ $^\circ$ ] for  $(\text{C}_9\text{H}_{15}\text{N}_3)_2\text{SnBr}_8$  at 150.0 K with estimated standard deviations in parentheses.)

**Figure S1.** (The scanning electron microscope (SEM) images and element maps of  $(\text{C}_9\text{H}_{15}\text{N}_3)_2\text{SnCl}_8$  and  $(\text{C}_9\text{H}_{15}\text{N}_3)_2\text{SnBr}_8$ .)

**Figure S2.** ((a) Experimental PXRD and calculated PXRD pattern based on the obtained structure of  $(\text{C}_9\text{H}_{15}\text{N}_3)_2\text{SnCl}_8$  and  $(\text{C}_9\text{H}_{15}\text{N}_3)_2\text{SnBr}_8$ . (b) The band gap of  $(\text{C}_9\text{H}_{15}\text{N}_3)_2\text{SnCl}_8$  and  $(\text{C}_9\text{H}_{15}\text{N}_3)_2\text{SnBr}_8$  determined from a Tauc plot.)

**Figure S3.** ((a) and (b) TGA of  $(\text{C}_9\text{H}_{15}\text{N}_3)_2\text{SnCl}_8$  and  $(\text{C}_9\text{H}_{15}\text{N}_3)_2\text{SnBr}_8$ .  $T_o$  represents the onset decomposition temperature of the sample.)

**Figure S4.** ((a) Excitation and emission spectra of  $(\text{C}_9\text{H}_{15}\text{N}_3)_2\text{SnCl}_8$ . The inset shows the crystals under 365 nm excitation. (b) PL decay curves of  $(\text{C}_9\text{H}_{15}\text{N}_3)_2\text{SnCl}_8$  at 100 K. (c) The configuration coordinate diagram of  $(\text{C}_9\text{H}_{15}\text{N}_3)_2\text{SnCl}_8$ .)

**Figure S5.** (Normalized emission spectra of organic molecular and  $(\text{C}_9\text{H}_{15}\text{N}_3)_2\text{SnCl}_8$  under the same excitation wavelength at room temperature. The inset is a photo of organic molecular under daylight (left) and 365 nm UV lamp (right).)

**Figure S6.** (The EDS analysis of  $\text{Sb}^{3+}$ -doped  $(\text{C}_9\text{H}_{15}\text{N}_3)_2\text{SnCl}_8$ .)

**Figure S7.** ((a) Linear fitting of the metal cation ratio obtained by EDS to the feed ratio. (b) Elemental mapping of  $(\text{C}_9\text{H}_{15}\text{N}_3)_2(\text{Sn}_{0.77}\text{Sb}_{0.23})\text{Cl}_8$ . (c) Absorption spectra of  $(\text{C}_9\text{H}_{15}\text{N}_3)_2\text{SnCl}_8$  with different doping levels.)

**Figure S8.** (CIE color coordinates of  $\text{Sb}^{3+}$ -doped  $(\text{C}_9\text{H}_{15}\text{N}_3)_2\text{SnCl}_8$ .)

**Figure S9.** ((a) PXRD patterns obtained from fresh and after storage in air for 3 months for  $(\text{C}_9\text{H}_{15}\text{N}_3)_2\text{SnCl}_8$  and  $(\text{C}_9\text{H}_{15}\text{N}_3)_2(\text{Sn}_{0.77}\text{Sb}_{0.23})\text{Cl}_8$ . (b) TGA of  $(\text{C}_9\text{H}_{15}\text{N}_3)_2(\text{Sn}_{0.77}\text{Sb}_{0.23})\text{Cl}_8$ .)

**Figure S10.** (Crystal structure of  $(\text{C}_9\text{H}_{15}\text{N}_3)_2(\text{Sn}_{0.75}\text{Sb}_{0.25})\text{Cl}_8$ .)

**Figure S11.** ((a) Comparison of the  $(\text{C}_9\text{H}_{15}\text{N}_3)_2(\text{Sn}_{0.77}\text{Sb}_{0.23})\text{Cl}_8$  sample emission peaks at different temperatures. (b) Temperature dependence of the PL spectra of  $(\text{C}_9\text{H}_{15}\text{N}_3)_2\text{SnCl}_8$ .)

**Figure S12.** (PL decay curves of  $(\text{C}_9\text{H}_{15}\text{N}_3)_2\text{SnCl}_8$  at 100 K.)

**Table S1.** Atomic coordinates ( $\times 10^4$ ) and equivalent isotropic displacement parameters ( $\text{\AA}^2 \times 10^3$ ) for  $(\text{C}_9\text{H}_{15}\text{N}_3)_2\text{SnCl}_8$  at 150.0 K with estimated standard deviations in parentheses.

| Label | $x$      | $y$     | $z$     | Occupancy | $U_{\text{eq}}^*$ |
|-------|----------|---------|---------|-----------|-------------------|
| Sn(1) | 0        | 5000    | 0       | 1         | 28(1)             |
| Cl(1) | 183(1)   | 6182(1) | 1522(1) | 1         | 39(1)             |
| Cl(2) | 2275(1)  | 4104(1) | 957(1)  | 1         | 39(1)             |
| Cl(3) | -1699(1) | 3851(1) | 777(1)  | 1         | 39(1)             |
| Cl(4) | 4401(1)  | 6125(1) | 6242(1) | 1         | 38(1)             |
| N(1)  | 7455(2)  | 6239(2) | 5399(2) | 1         | 34(1)             |
| N(2)  | 6511(2)  | 6552(2) | 3559(2) | 1         | 34(1)             |
| N(3)  | 3924(2)  | 6549(2) | 1825(2) | 1         | 38(1)             |
| C(1)  | 8596(2)  | 6086(2) | 6282(2) | 1         | 38(1)             |
| C(2)  | 10081(2) | 6108(2) | 6189(2) | 1         | 40(1)             |
| C(3)  | 10408(2) | 6309(2) | 5158(2) | 1         | 40(1)             |
| C(4)  | 9257(2)  | 6466(2) | 4276(2) | 1         | 36(1)             |
| C(5)  | 7724(2)  | 6428(2) | 4393(2) | 1         | 32(1)             |
| C(6)  | 6734(2)  | 6540(2) | 2438(2) | 1         | 38(1)             |
| C(7)  | 5373(2)  | 6018(2) | 1706(2) | 1         | 40(1)             |
| C(8)  | 3724(2)  | 6532(2) | 2982(2) | 1         | 39(1)             |
| C(9)  | 5078(2)  | 7057(2) | 3690(2) | 1         | 36(1)             |

\* $U_{\text{eq}}$  is defined as one-third of the trace of the orthogonalized  $U_{ij}$  tensor.

**Table S2.** Atomic coordinates ( $\times 10^4$ ) and equivalent isotropic displacement parameters ( $\text{\AA}^2 \times 10^3$ ) for  $(\text{C}_9\text{H}_{15}\text{N}_3)_2\text{SnBr}_8$  at 150.0 K with estimated standard deviations in parentheses.

| Label  | $x$      | $y$     | $z$     | Occupancy | $U_{\text{eq}}^*$ |
|--------|----------|---------|---------|-----------|-------------------|
| Sn(01) | 10000    | 5000    | 10000   | 1         | 28(1)             |
| Br(1)  | 7600(1)  | 5873(1) | 8998(1) | 1         | 36(1)             |
| Br(2)  | 11669(1) | 6206(1) | 9133(1) | 1         | 40(1)             |
| Br(3)  | 9848(1)  | 3736(1) | 8448(1) | 1         | 38(1)             |
| Br(4)  | 5813(1)  | 1091(1) | 8809(1) | 1         | 36(1)             |
| N(1)   | 6069(4)  | 3475(3) | 8159(3) | 1         | 36(1)             |
| N(2)   | 3576(4)  | 3385(3) | 6474(3) | 1         | 33(1)             |
| N(3)   | 2710(4)  | 3764(2) | 4683(3) | 1         | 33(1)             |
| C(1)   | 6246(5)  | 3504(3) | 7024(3) | 1         | 38(1)             |

|      |         |         |         |   |       |
|------|---------|---------|---------|---|-------|
| C(2) | 4975(4) | 2944(3) | 6349(3) | 1 | 34(1) |
| C(3) | 3366(5) | 3373(3) | 7577(3) | 1 | 37(1) |
| C(4) | 4629(5) | 3931(3) | 8283(3) | 1 | 38(1) |
| C(5) | 2430(4) | 3550(3) | 5648(3) | 1 | 30(1) |
| C(6) | 948(5)  | 3525(3) | 5752(3) | 1 | 36(1) |
| C(7) | -142(5) | 3719(3) | 4885(4) | 1 | 40(1) |
| C(8) | 209(5)  | 3950(3) | 3903(4) | 1 | 41(1) |
| C(9) | 1647(5) | 3962(3) | 3820(3) | 1 | 38(1) |

\* $U_{eq}$  is defined as one-third of the trace of the orthogonalized  $U_{ij}$  tensor.

**Table S3.** Anisotropic displacement parameters ( $\text{\AA}^2 \times 10^3$ ) for  $(\text{C}_9\text{H}_{15}\text{N}_3)_2\text{SnCl}_8$  at 150.0 K with estimated standard deviations in parentheses.

| Label | $U_{11}$ | $U_{22}$ | $U_{33}$ | $U_{12}$ | $U_{13}$ | $U_{23}$ |
|-------|----------|----------|----------|----------|----------|----------|
| Sn(1) | 26(1)    | 31(1)    | 27(1)    | 0(1)     | 4(1)     | -1(1)    |
| Cl(1) | 35(1)    | 46(1)    | 37(1)    | -2(1)    | 8(1)     | -12(1)   |
| Cl(2) | 32(1)    | 39(1)    | 42(1)    | 5(1)     | 1(1)     | 3(1)     |
| Cl(3) | 38(1)    | 43(1)    | 39(1)    | -6(1)    | 9(1)     | 4(1)     |
| Cl(4) | 36(1)    | 39(1)    | 40(1)    | -1(1)    | 8(1)     | 1(1)     |
| N(1)  | 34(1)    | 36(1)    | 34(1)    | 1(1)     | 6(1)     | 1(1)     |
| N(2)  | 31(1)    | 40(1)    | 31(1)    | 0(1)     | 6(1)     | 0(1)     |
| N(3)  | 34(1)    | 40(1)    | 37(1)    | -7(1)    | 0(1)     | -1(1)    |
| C(1)  | 48(1)    | 34(1)    | 31(1)    | 2(1)     | 3(1)     | 0(1)     |
| C(2)  | 42(1)    | 37(1)    | 39(1)    | 3(1)     | -2(1)    | -2(1)    |
| C(3)  | 33(1)    | 37(1)    | 48(1)    | 0(1)     | 3(1)     | -4(1)    |
| C(4)  | 36(1)    | 36(1)    | 36(1)    | -1(1)    | 7(1)     | -1(1)    |
| C(5)  | 36(1)    | 27(1)    | 33(1)    | -2(1)    | 4(1)     | -1(1)    |
| C(6)  | 35(1)    | 47(1)    | 33(1)    | -1(1)    | 7(1)     | 0(1)     |
| C(7)  | 41(1)    | 43(1)    | 34(1)    | -1(1)    | 5(1)     | -3(1)    |
| C(8)  | 34(1)    | 45(1)    | 39(1)    | -5(1)    | 7(1)     | 2(1)     |
| C(9)  | 33(1)    | 41(1)    | 33(1)    | 2(1)     | 5(1)     | 0(1)     |

The anisotropic displacement factor exponent takes the form:  $-2\pi^2[h^2a^*U_{11} + \dots + 2hka^*b^*U_{12}]$ .

**Table S4.** Anisotropic displacement parameters ( $\text{\AA}^2 \times 10^3$ ) for  $(\text{C}_9\text{H}_{15}\text{N}_3)_2\text{SnBr}_8$  at 150.0 K with estimated standard deviations in parentheses.

| Label  | $U_{11}$ | $U_{22}$ | $U_{33}$ | $U_{12}$ | $U_{13}$ | $U_{23}$ |
|--------|----------|----------|----------|----------|----------|----------|
| Sn(01) | 25(1)    | 30(1)    | 27(1)    | 0(1)     | 3(1)     | 0(1)     |
| Br(1)  | 30(1)    | 35(1)    | 40(1)    | 4(1)     | -1(1)    | 2(1)     |
| Br(2)  | 38(1)    | 43(1)    | 39(1)    | -7(1)    | 9(1)     | 6(1)     |
| Br(3)  | 33(1)    | 45(1)    | 37(1)    | 0(1)     | 6(1)     | -12(1)   |
| Br(4)  | 34(1)    | 35(1)    | 39(1)    | 1(1)     | 7(1)     | 0(1)     |
| N(1)   | 33(2)    | 36(2)    | 35(2)    | -5(2)    | 0(2)     | -1(2)    |
| N(2)   | 30(2)    | 39(2)    | 30(2)    | 0(2)     | 3(2)     | 0(2)     |
| N(3)   | 32(2)    | 35(2)    | 32(2)    | -1(2)    | 4(2)     | 0(2)     |
| C(1)   | 28(2)    | 44(2)    | 41(2)    | -6(2)    | 5(2)     | 2(2)     |
| C(2)   | 29(2)    | 37(2)    | 36(2)    | 2(2)     | 4(2)     | 3(2)     |
| C(3)   | 30(2)    | 46(2)    | 34(2)    | -3(2)    | 5(2)     | 2(2)     |
| C(4)   | 38(2)    | 42(2)    | 33(2)    | 0(2)     | 3(2)     | -2(2)    |
| C(5)   | 32(2)    | 25(2)    | 31(2)    | -2(2)    | 5(2)     | -2(2)    |
| C(6)   | 33(2)    | 36(2)    | 37(2)    | -2(2)    | 7(2)     | -2(2)    |
| C(7)   | 28(2)    | 40(2)    | 50(3)    | 4(2)     | 2(2)     | -5(2)    |
| C(8)   | 41(3)    | 35(2)    | 40(2)    | 5(2)     | -5(2)    | -3(2)    |
| C(9)   | 46(3)    | 35(2)    | 31(2)    | 1(2)     | 4(2)     | 0(2)     |

The anisotropic displacement factor exponent takes the form:  $-2\pi^2[h^2a^2U_{11} + \dots + 2hka*b*U_{12}]$ .

**Table S5.** Bond lengths [ $\text{\AA}$ ] for  $(\text{C}_9\text{H}_{15}\text{N}_3)_2\text{SnCl}_8$  at 150.0 K with estimated standard deviations in parentheses.

| Label         | Distances | Label     | Distances |
|---------------|-----------|-----------|-----------|
| Sn(1)-Cl(1)   | 2.4136(4) | N(2)-C(9) | 1.467(2)  |
| Sn(1)-Cl(1)#1 | 2.4137(4) | N(3)-C(7) | 1.491(2)  |
| Sn(1)-Cl(2)#1 | 2.4291(4) | N(3)-C(8) | 1.496(2)  |
| Sn(1)-Cl(2)   | 2.4291(4) | C(1)-C(2) | 1.350(3)  |
| Sn(1)-Cl(3)#1 | 2.4431(4) | C(2)-C(3) | 1.403(3)  |
| Sn(1)-Cl(3)   | 2.4431(4) | C(3)-C(4) | 1.367(2)  |
| N(1)-C(1)     | 1.362(2)  | C(4)-C(5) | 1.402(2)  |
| N(1)-C(5)     | 1.352(2)  | C(6)-C(7) | 1.523(2)  |
| N(2)-C(5)     | 1.357(2)  | C(8)-C(9) | 1.507(2)  |

N(2)-C(6) 1.458(2)

Symmetry transformations used to generate equivalent atoms.

**Table S6.** Bond lengths [ $\text{\AA}$ ] for  $(\text{C}_9\text{H}_{15}\text{N}_3)_2\text{SnBr}_8$  at 150.0 K with estimated standard deviations in parentheses.

| Label          | Distances | Label     | Distances |
|----------------|-----------|-----------|-----------|
| Sn(01)-Br(1)#1 | 2.6058(4) | N(2)-C(5) | 1.363(5)  |
| Sn(01)-Br(1)   | 2.6058(4) | N(3)-C(5) | 1.344(5)  |
| Sn(01)-Br(2)   | 2.6078(4) | N(3)-C(9) | 1.355(5)  |
| Sn(01)-Br(2)#1 | 2.6078(4) | C(1)-C(2) | 1.509(5)  |
| Sn(01)-Br(3)   | 2.5752(4) | C(3)-C(4) | 1.520(6)  |
| Sn(01)-Br(3)#1 | 2.5752(4) | C(5)-C(6) | 1.403(6)  |
| N(1)-C(1)      | 1.496(6)  | C(6)-C(7) | 1.371(6)  |
| N(1)-C(4)      | 1.498(6)  | C(7)-C(8) | 1.394(7)  |
| N(2)-C(2)      | 1.455(5)  | C(8)-C(9) | 1.355(7)  |
| N(2)-C(3)      | 1.466(5)  |           |           |

Symmetry transformations used to generate equivalent atoms.

**Table S7.** Bond angles [ $^\circ$ ] for  $(\text{C}_9\text{H}_{15}\text{N}_3)_2\text{SnCl}_8$  at 150.0 K with estimated standard deviations in parentheses.

| Label                 | Angles      | Label          | Angles     |
|-----------------------|-------------|----------------|------------|
| Cl(1)-Sn(1)-Cl(1)#1   | 180.000(16) | C(5)-N(2)-C(6) | 120.26(14) |
| Cl(1)#1-Sn(1)-Cl(2)   | 90.954(15)  | C(5)-N(2)-C(9) | 122.85(14) |
| Cl(1)#1-Sn(1)-Cl(2)#1 | 89.047(15)  | C(6)-N(2)-C(9) | 113.51(13) |
| Cl(1)-Sn(1)-Cl(2)     | 89.046(15)  | C(7)-N(3)-C(8) | 111.09(13) |
| Cl(1)-Sn(1)-Cl(2)#1   | 90.953(15)  | C(2)-C(1)-N(1) | 120.87(16) |
| Cl(1)-Sn(1)-Cl(3)     | 90.632(15)  | C(1)-C(2)-C(3) | 117.87(16) |
| Cl(1)#1-Sn(1)-Cl(3)#1 | 90.632(15)  | C(4)-C(3)-C(2) | 120.98(17) |
| Cl(1)-Sn(1)-Cl(3)#1   | 89.368(15)  | C(3)-C(4)-C(5) | 120.03(17) |
| Cl(1)#1-Sn(1)-Cl(3)   | 89.368(15)  | N(1)-C(5)-N(2) | 118.77(15) |
| Cl(2)-Sn(1)-Cl(2)#1   | 180.0       | N(1)-C(5)-C(4) | 117.25(15) |
| Cl(2)-Sn(1)-Cl(3)#1   | 87.630(15)  | N(2)-C(5)-C(4) | 123.97(15) |
| Cl(2)#1-Sn(1)-Cl(3)   | 87.630(15)  | N(2)-C(6)-C(7) | 110.10(14) |
| Cl(2)#1-Sn(1)-Cl(3)#1 | 92.370(15)  | N(3)-C(7)-C(6) | 110.05(14) |

|                     |            |                |            |
|---------------------|------------|----------------|------------|
| Cl(2)-Sn(1)-Cl(3)   | 92.371(15) | N(3)-C(8)-C(9) | 109.40(13) |
| Cl(3)-Sn(1)-Cl(3)#1 | 180.0      | N(2)-C(9)-C(8) | 110.54(14) |
| C(5)-N(1)-C(1)      | 123.00(15) |                |            |

Symmetry transformations used to generate equivalent atoms.

**Table S8.** Bond angles [°] for  $(C_9H_{15}N_3)_2SnBr_8$  at 150.0 K with estimated standard deviations in parentheses.

| Label                      | Angles     | Label          | Angles   |
|----------------------------|------------|----------------|----------|
| Br(1)#1-Sn(01)-Br(1)       | 180.0      | C(2)-N(2)-C(3) | 113.0(3) |
| Br(1)#1-Sn(01)-Br(2)       | 87.670(14) | C(5)-N(2)-C(2) | 123.5(3) |
| Br(1)-Sn(01)-Br(2)#1       | 87.672(14) | C(5)-N(2)-C(3) | 121.5(4) |
| Br(1)-Sn(01)-Br(2)         | 92.329(14) | C(5)-N(3)-C(9) | 123.6(4) |
| Br(1)#1-Sn(01)-<br>Br(2)#1 | 92.330(14) | N(1)-C(1)-C(2) | 109.0(3) |
| Br(2)#1-Sn(01)-Br(2)       | 180.0      | N(2)-C(2)-C(1) | 110.7(3) |
| Br(3)-Sn(01)-Br(1)#1       | 90.595(14) | N(2)-C(3)-C(4) | 109.9(4) |
| Br(3)#1-Sn(01)-<br>Br(1)#1 | 89.405(14) | N(1)-C(4)-C(3) | 109.9(3) |
| Br(3)#1-Sn(01)-Br(1)       | 90.595(14) | N(2)-C(5)-C(6) | 123.4(4) |
| Br(3)-Sn(01)-Br(1)         | 89.405(14) | N(3)-C(5)-N(2) | 119.3(4) |
| Br(3)-Sn(01)-Br(2)         | 90.589(15) | N(3)-C(5)-C(6) | 117.3(4) |
| Br(3)#1-Sn(01)-<br>Br(2)#1 | 90.589(15) | C(7)-C(6)-C(5) | 119.8(4) |
| Br(3)#1-Sn(01)-Br(2)       | 89.410(15) | C(6)-C(7)-C(8) | 120.6(4) |
| Br(3)-Sn(01)-Br(2)#1       | 89.412(15) | C(9)-C(8)-C(7) | 118.5(4) |
| Br(3)#1-Sn(01)-Br(3)       | 180.0      | N(3)-C(9)-C(8) | 120.2(4) |
| C(1)-N(1)-C(4)             | 111.2(3)   |                |          |

Symmetry transformations used to generate equivalent atoms.



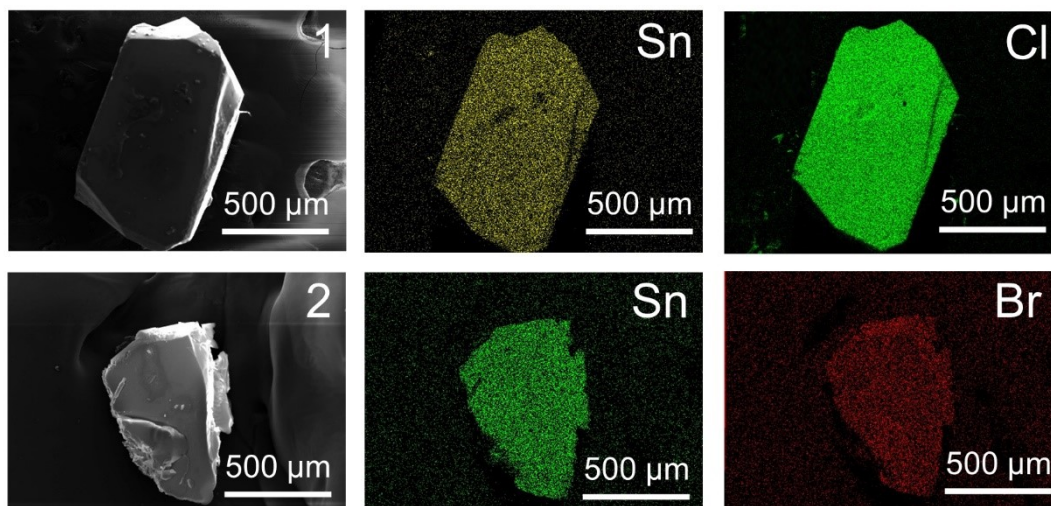

**Figure S1.** The scanning electron microscope (SEM) images and element maps of  $(\text{C}_9\text{H}_{15}\text{N}_3)_2\text{SnCl}_8$  (1) and  $(\text{C}_9\text{H}_{15}\text{N}_3)_2\text{SnBr}_8$  (2).

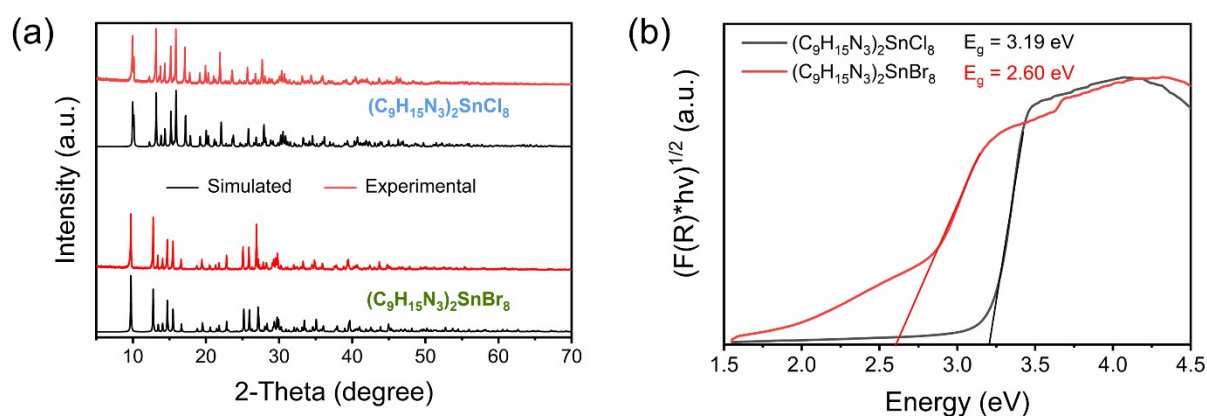

**Figure S2.** (a) Experimental PXR D and calculated PXR D pattern based on the obtained structure of  $(\text{C}_9\text{H}_{15}\text{N}_3)_2\text{SnCl}_8$  and  $(\text{C}_9\text{H}_{15}\text{N}_3)_2\text{SnBr}_8$ . (b) The band gap of  $(\text{C}_9\text{H}_{15}\text{N}_3)_2\text{SnCl}_8$  and  $(\text{C}_9\text{H}_{15}\text{N}_3)_2\text{SnBr}_8$  determined from a Tauc plot.

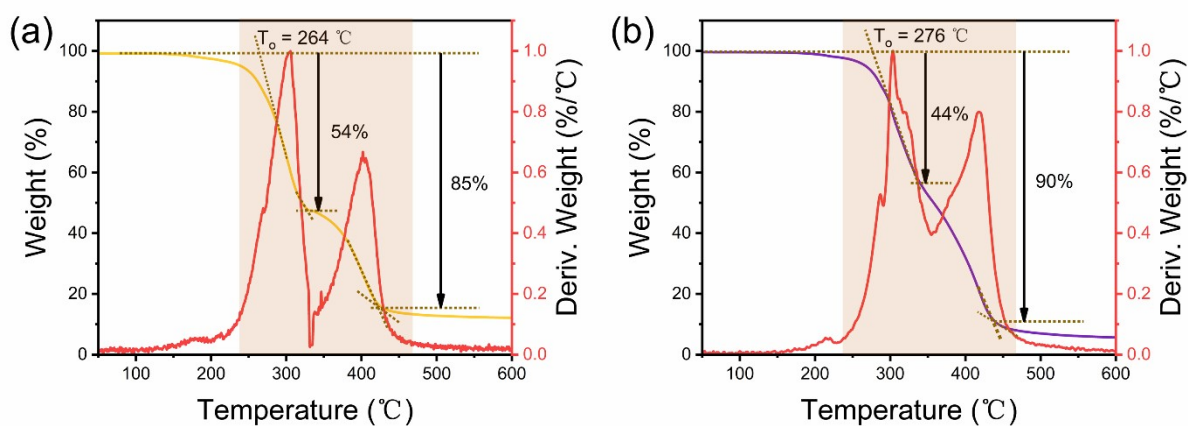

**Figure S3.** (a) and (b) TGA of  $(C_9H_{15}N_3)_2SnCl_8$  ( $(C_9H_{15}N_3)_2SnBr_8$ ).  $T_o$  represents the onset decomposition temperature of the sample.

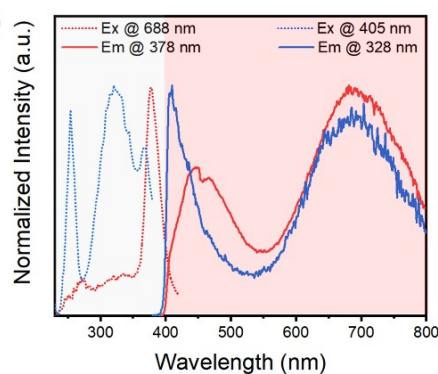

**Figure S4.** (a) Excitation and emission spectra of  $(C_9H_{15}N_3)_2SnCl_8$ .

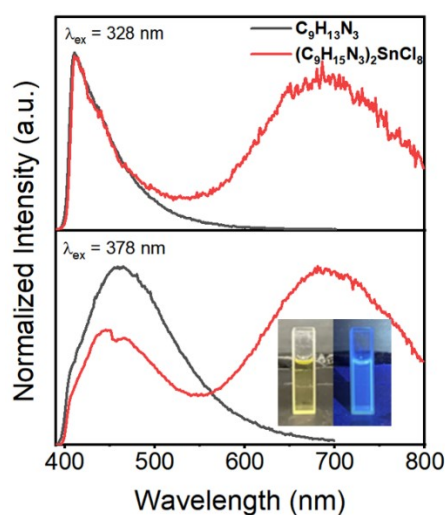

**Figure S5.** Normalized emission spectra of organic molecular and  $(C_9H_{15}N_3)_2SnCl_8$  under the same excitation wavelength at room temperature. The inset is a photo of organic molecular under daylight (left) and 365 nm UV lamp (right).

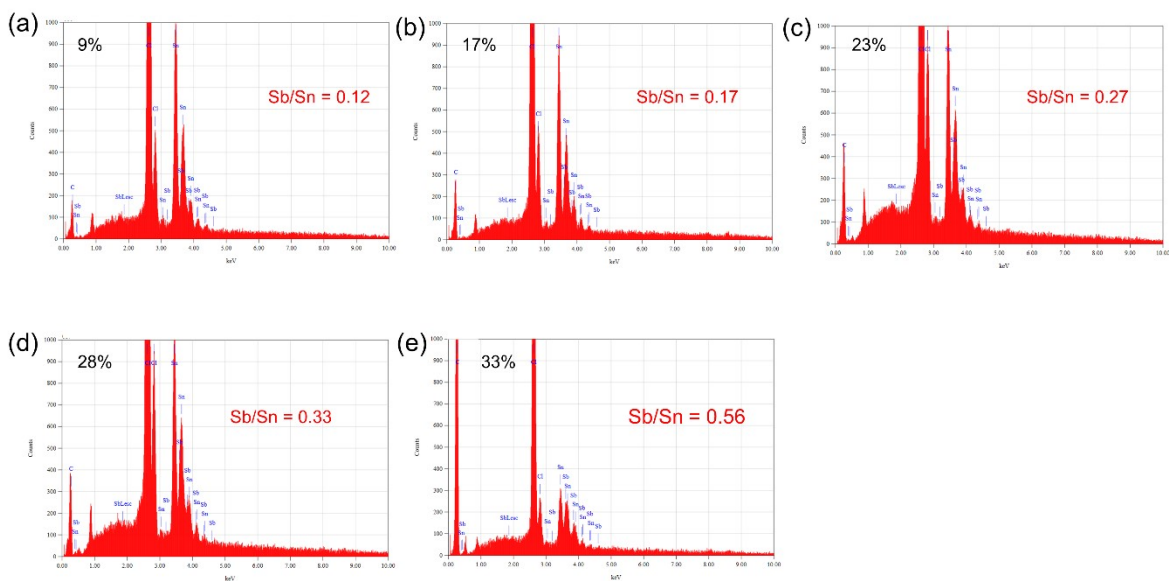

**Figure S6.** The EDS analysis of  $\text{Sb}^{3+}$ -doped  $(\text{C}_9\text{H}_{15}\text{N}_3)_2\text{SnCl}_8$ .

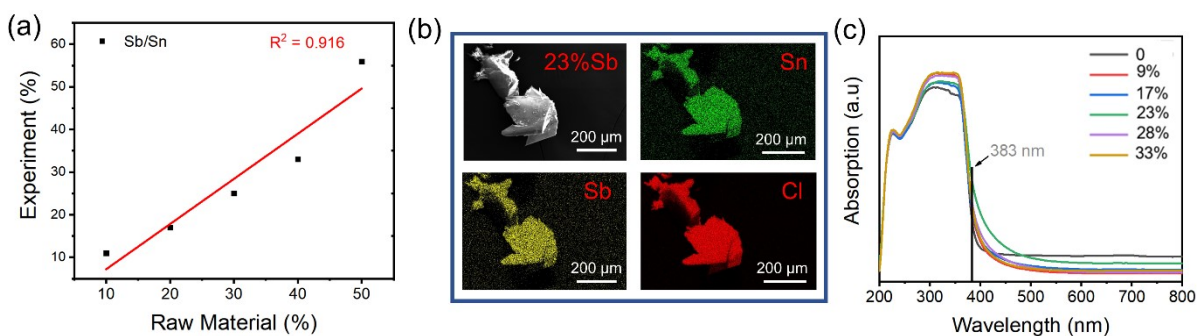

**Figure S7.** (a) Linear fitting of the metal cation ratio obtained by EDS to the feed ratio. (b) Elemental mapping of  $(\text{C}_9\text{H}_{15}\text{N}_3)_2(\text{Sn}_{0.77}\text{Sb}_{0.23})\text{Cl}_8$ . (c) Absorption spectra of  $(\text{C}_9\text{H}_{15}\text{N}_3)_2\text{SnCl}_8$  with different doping levels.

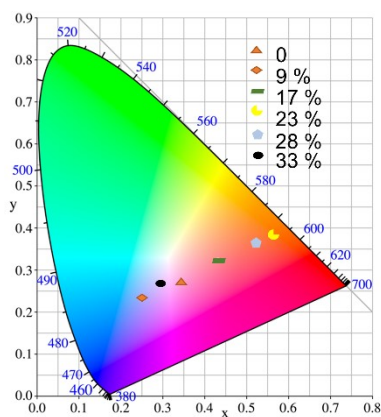

**Figure S8.** CIE color coordinates of  $\text{Sb}^{3+}$ -doped  $(\text{C}_9\text{H}_{15}\text{N}_3)_2\text{SnCl}_8$ .

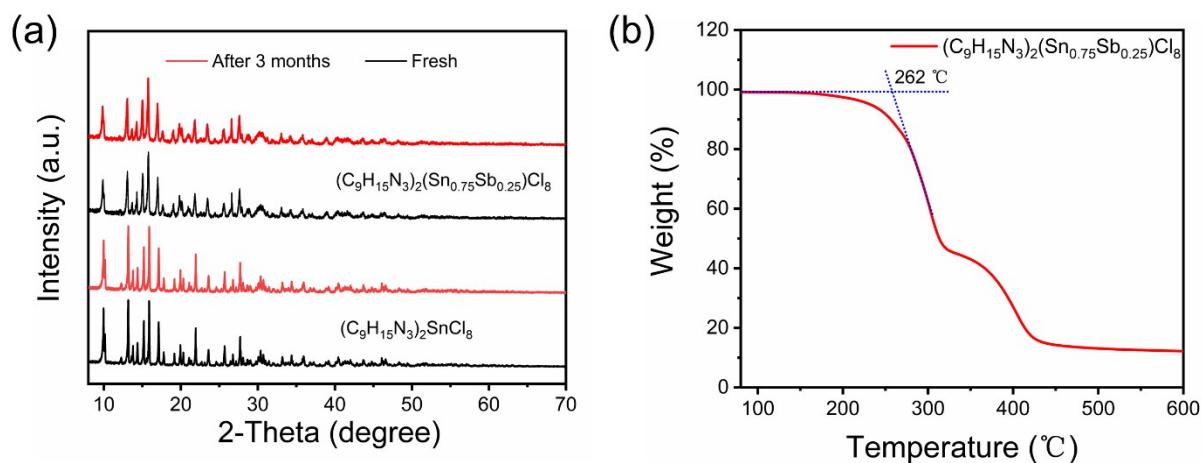

**Figure S9.** (a) PXRD patterns obtained from fresh and after storage in air for 3 months for  $(C_9H_{15}N_3)_2SnCl_8$  and  $(C_9H_{15}N_3)_2(Sn_{0.77}Sb_{0.23})Cl_8$ . (b) TGA of  $(C_9H_{15}N_3)_2(Sn_{0.77}Sb_{0.23})Cl_8$ .

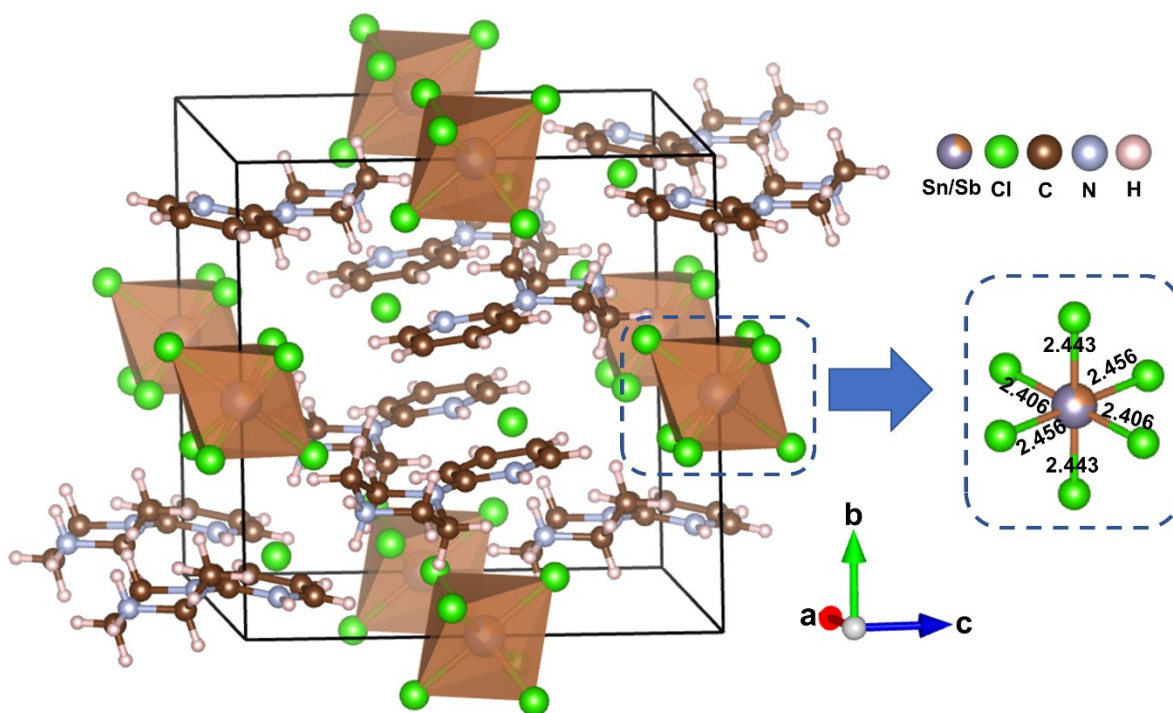

**Figure S10.** Crystal structure of  $(C_9H_{15}N_3)_2(Sn_{0.75}Sb_{0.25})Cl_8$ .

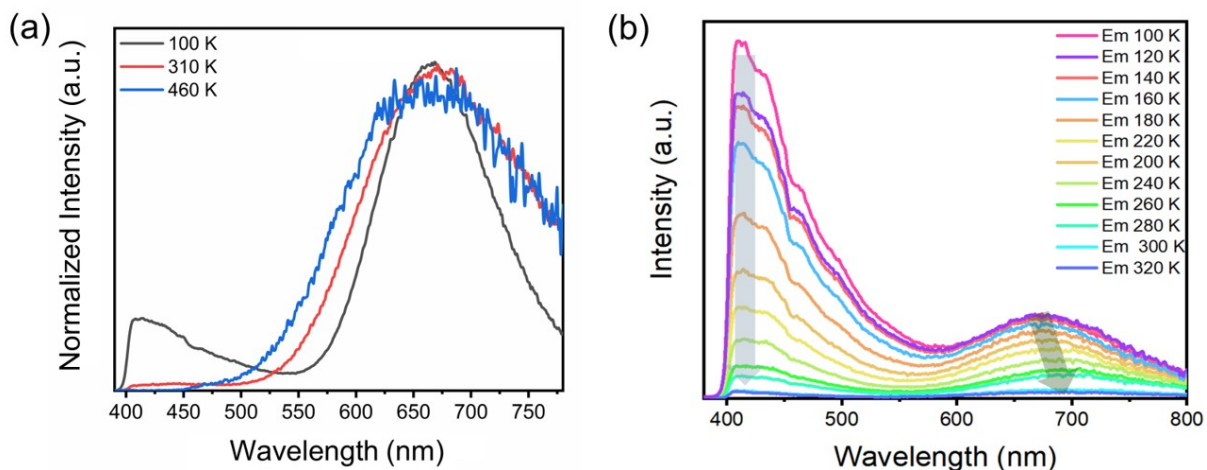

**Figure S11.** (a) Comparison of normalized PL peaks of  $(C_9H_{15}N_3)_2(Sn_{0.77}Sb_{0.23})Cl_8$  at different temperatures. (b) Temperature dependence of the PL spectra of  $(C_9H_{15}N_3)_2SnCl_8$ .

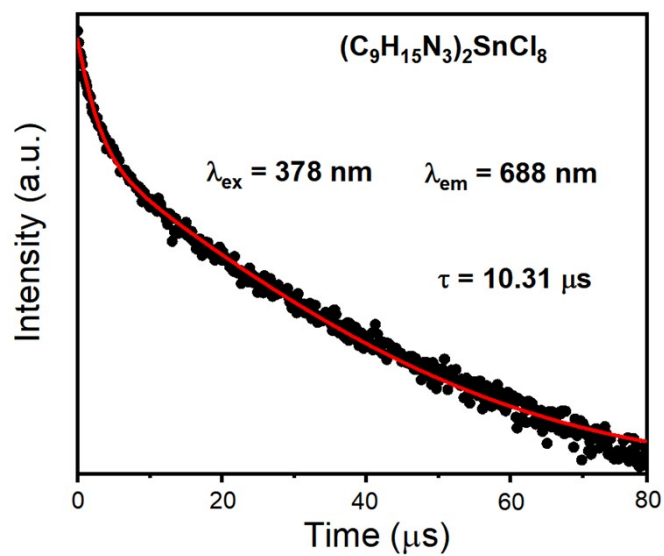

**Figure S12.** PL decay curves of  $(C_9H_{15}N_3)_2SnCl_8$  at 100 K.
